# Tissue spatial correlation as cancer marker

Masanori Takabayashi<sup>a,b,\*</sup>, Hassaan Majeed<sup>c</sup>, Andre Kajdacsy-Balla<sup>d</sup>, Gabriel Popescu<sup>b,c</sup>

<sup>a</sup>Kyushu Institute of Technology, Department of Systems Design and Informatics, 680-4 Kawazu, Iizuka, Japan, 820-8502

<sup>b</sup>University of Illinois at Urbana-Champaign, Beckman Institute of Advanced Science and Technology, Department of Electrical and Computer Engineering, 405 N. Mathews Ave., Urbana, Illinois, United States, 61801

<sup>c</sup>University of Illinois at Urbana-Champaign, Beckman Institute of Advanced Science and Technology, Department of Bioengineering, 405 N. Mathews Ave., Urbana, Illinois, United States, 61801

<sup>d</sup>University of Illinois at Chicago, Department of Pathology, 840 South Wood Street, Suite 130 CSN, Chicago, Illinois, United States, 60612

**Abstract.** We propose a new intrinsic cancer marker in fixed tissue biopsy slides, which is based on the local spatial autocorrelation length obtained from quantitative phase images. The spatial autocorrelation length in a small region of the tissue phase image is sensitive to the nanoscale cellular morphological alterations and can hence inform on carcinogenesis. Therefore, this metric can potentially be used as an intrinsic cancer marker in histopathology. Typically, these correlation length maps are calculated by computing 2D Fourier transforms over image sub-regions – requiring long computational times. In this paper, we propose a more time efficient method of computing the correlation map and demonstrate its value for screening of benign and malignant breast tissues. Our methodology is based on highly sensitive quantitative phase imaging data obtained by spatial light interference microscopy (SLIM).

**Keywords:** quantitative phase imaging, biopsy slide diagnosis, breast cancer.

\*Masanori Takabayashi, [takabayashi@ces.kyutech.ac.jp](mailto:takabayashi@ces.kyutech.ac.jp)

## 1 Introduction

According to the World Health Organization (WHO), cancer is a major cause of death globally.<sup>1</sup> Effective treatment strategies require early and accurate diagnosis of the disease. The gold standard method for cancer diagnosis is the microscopic investigation of a stained tissue biopsy by a trained clinical pathologist. Through this investigation, the pathologist looks for morphological signatures of either normal or abnormal tissue. Being qualitative, this type of assessment not only leads to inter-observer discrepancy but automation of some or part of the process through machine learning and image analysis is complicated by stain variability.<sup>2,3</sup> Ensuring consistency in the disease signatures extracted through image analysis of stained tissue remains a significant challenge due to variations in tissue preparation.<sup>4</sup>

Quantitative phase imaging (QPI)<sup>5</sup> is a label-free microscopy technique where contrast is generated by the optical path-length difference (OPD), which is the product of the local thickness and refractive index of the specimen.<sup>5-7</sup> For thin specimen, such as a tissue histology, the thickness can be considered spatially invariant, in which case QPI images provide a refractive index map.<sup>8,9</sup> Since the refractive index is proportional to the dry mass content of cells and cellular matrix, it informs on tissue density as well as cell organization within tissue.<sup>10,11</sup> Tissue refractive index based markers have been used in the past for medical diagnosis and prognosis of several types of cancers and diseases.<sup>12-24</sup> By generating contrast label-free, QPI lends itself much more readily to automated image analysis than bright-field microscopy, since stain variation is no longer an issue.<sup>13</sup>

In addition to the advantages of label-free imaging, the novel contrast mechanism in QPI provides access to additional, novel markers of disease, of value to histopathology.<sup>14,25</sup> In particular, since QPI systems employ interferometric measurements, they are sensitive to sub-wavelength fluctuations in OPD in both space and time.<sup>5</sup> As a result, the quantitative phase image reflects nanoscale morphological alterations in the tissue slice. The tissue metric referred to as “ disorder strength ”, a marker of the spatial fluctuations of refractive index, i.e., nanoscale morphological alterations, was first used as a marker for pancreatic cancer diagnosis by Subramanian et al.<sup>26</sup> Their group used a spectroscopic imaging modality to measure this marker and have subsequently employed it in diagnostic studies related to prostate, colon, breast, lung and other cancers.<sup>27-36</sup> Thereafter, Eldridge et al. successfully extracted the disorder strength from quantitative phase images and demonstrated the relationship of the marker to cancer cell mechanical properties.<sup>37</sup> They applied this analysis to colon, skin and lung cancer cells to demonstrate an inverse relationship between shear stiffness and disorder strength. Building on these results, A. Muoz et al. used QPI to study the on-set and progression of shear-stiffness changes during malignant transformation in

bronchial epithelial cells.<sup>38</sup> Our group also showed that the disorder strength measured by spatial light interference microscopy (SLIM), a sensitive white light QPI method, is a quantitative marker of malignancy that can be used to classify benign and malignant breast tissue microarray (TMA) cores.<sup>8</sup>

In this paper, we propose the local spatial autocorrelation length as a new intrinsic marker of nanoscale morphological alteration in fixed tissue biopsies. Since the spatial autocorrelation length is related to the spatial refractive index fluctuations, which has been shown to detect malignancy in previous works, the length in a local region of tissue can be correlated with carcinogenesis. In the past, the local spatial autocorrelation length map was computed by calculating the 2D correlation function over regions of an image leading to long computation times. In this work, we present a more efficient algorithm for calculating the local spatial autocorrelation length map, requiring a smaller number of calculation steps. We then classify benign and malignant breast TMA cores using the local spatial autocorrelation length calculated by proposed algorithm.

## 2 Materials and Methods

### 2.1 Spatial Light Interference Microscopy (SLIM)

The phase image,  $\phi(x, y)$ , measured in QPI is given by the expression

$$\phi(x, y) = \frac{2\pi}{\lambda} \delta n(x, y) L(x, y), \quad (1)$$

where  $\delta n(x, y)$  is the refractive index contrast between the tissue and the surrounding medium,  $L(x, y)$  is the thickness of the tissue and  $\lambda$  the illumination wavelength. In this work, we use thick tissue slices with small lateral variation in thickness ( $L(x, y) \approx L$ ) as the specimen.

A schematic of the SLIM setup is shown in Fig. 1(a). The SLIM module is attached to a commercial phase contrast microscope (PCM). The lamp filament is imaged onto the condenser annulus (Köhler illumination conditions) which is located at the front focal plane of the condenser lens. The specimen is located at the back focal plane of the condenser lens, and front focal plane of the objective. The scattered and unscattered fields are relayed by the objective and tube lenses. As a result, the expanded phase contrast image which has the intensity distribution in accordance with the phase contrast caused by the specimen is observed at the image plane. However, because the output of PCM is qualitative, the phase image,  $\phi(x, y)$ , cannot be directly retrieved from this image. The SLIM module extracts  $\phi(x, y)$  by phase modulating the incident light with respect to the scattered light. The field at the image plane is Fourier transformed by the lens L1, such that the unscattered light can be spatially isolated from the scattered light. Since the incident light has the ring form, by displaying the corresponding ring pattern on the reflective liquid crystal phase modulator (LCPM), we insure that the scattered light remains unaffected. Four phase shifts are applied to the unscattered light at increments of  $\pi/2$  rad, as shown in Fig. 1(b). The corresponding four images captured by the charge coupled device (CCD) are obtained. Consequently, the quantitative phase image is retrieved as described in Ref. 5. Figure 1(c) shows the quantitative phase image and its expanded view of benign and malignant breast tissue samples.

## 2.2 Breast tissue microarrays

The samples comprised a tissue microarray (TMA) of cores constructed from breast tissue biopsies of 40 different patients. Each biopsy was formalin fixed and paraffin embedded before sectioning it into slices of  $4 \mu\text{m}$  thickness each using a microtome. Two parallel, adjacent sections were selected from each biopsy and one of these sections was stained using H&E, leaving the other

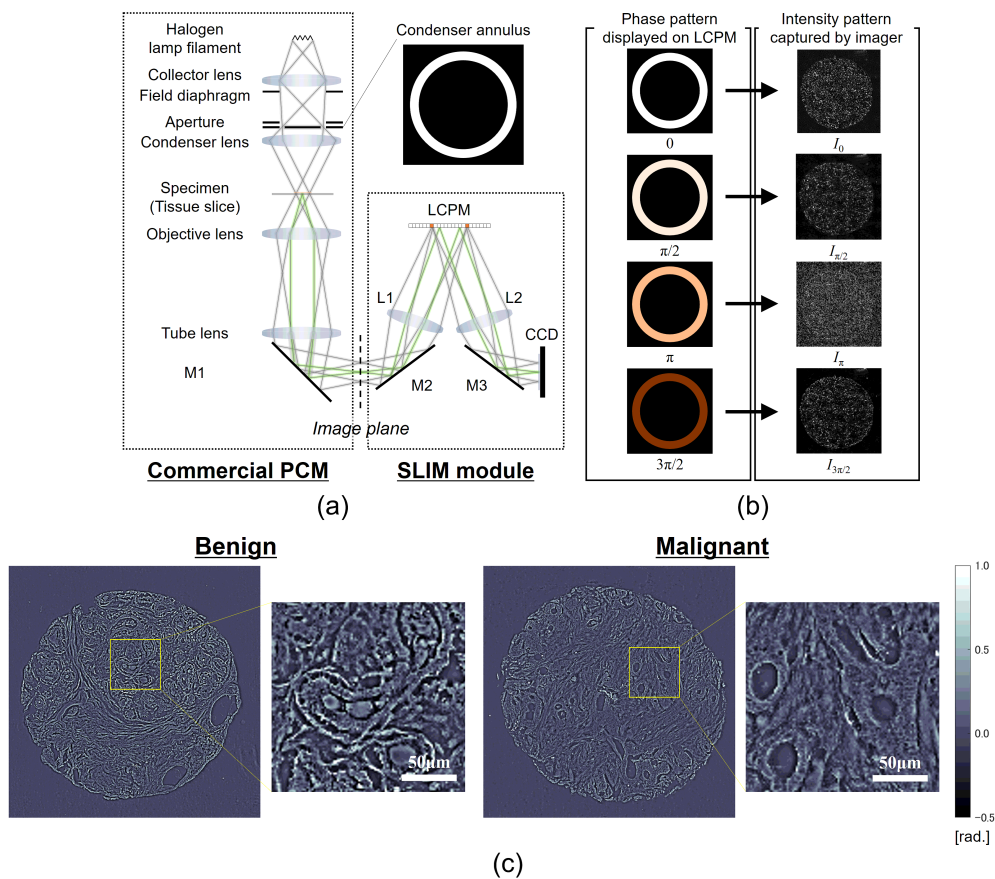

**Fig 1** SLIM system. (a) Optical setup. (b) Phase patterns displayed on LCPM and corresponding intensity patterns captured by CCD. (c) Example of quantitative phase images of benign and malignant breast tissue cores and their expanded views.

one unstained. Cores were then constructed for both the stained and unstained tissue, and these were mounted on separate slides after de-paraffinization, using xylene as the mounting medium. The stained samples were imaged using a bright-field microscope, and their images were used by a board certified pathologist for diagnosing each core. Each patient consented to their tissue samples being used as a part of the study and the process of obtaining consent was approved by the Institute Review Board (IRB Protocol Number 2010-0519) at University of Illinois at Chicago (UIC). The data analysis was conducted on the samples at the University of Illinois at Urbana-Champaign (UIUC) after all patient identifiers had been removed. The procedures used in this study for conducting experiments using human subjects were also approved by the institute review board at UIUC (IRB Protocol Number 13900).

### *2.3 Formulation for local spatial autocorrelation length map*

As mentioned, the local spatial autocorrelation length depends on the morphological disorder, i.e., local refractive index fluctuations. When the refractive index is spatially disordered, the spatial autocorrelation length within the local area will shorten.

In general, the spatial autocorrelation length is calculated as the width of the spatial autocorrelation function. According to the Wiener-Khinchin theorem, the 2D spatial autocorrelation function can be obtained by taking inverse 2D Fourier transform of the spatial power spectrum. In other words, two 2D Fourier transforms for each image, leading to long computation times. Thus, to avoid this problem, we propose a new procedure that performs these calculation in the frequency-domain.

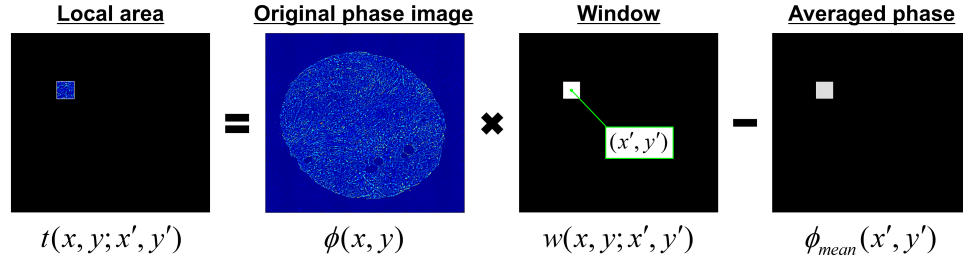

**Fig 2** Definition of local 2D function  $t(x, y; x', y')$ .

First, as shown in Fig. 2, we define the local spatial autocorrelation function as

$$\Gamma(x, y; x', y') = t(x, y; x', y') \otimes_{x,y} t(x, y; x', y'), \quad (2)$$

where  $\otimes_{x,y}$  denotes the 2D correlation operation over  $(x, y)$ . Function  $t(x, y; x', y')$  is a local phase function centered at  $(x', y')$  and is expressed as

$$t(x, y; x', y') = \Delta\phi(x, y; x', y') w(x, y; x', y'), \quad (3)$$

where  $w(x, y; x', y') = \text{rect}\left(\frac{x-x'}{a}\right) \text{rect}\left(\frac{y-y'}{a}\right)$  is a local window function centered at  $(x', y')$ , of width of  $a$ , and  $\Delta\phi(x, y; x', y') = \phi(x, y; x', y') - \langle \phi(x, y; x', y') \rangle_{(x,y)}$ . The angular brackets denote averaging over the  $(x, y)$  space.

Next, we define the local spatial autocorrelation length map,  $\rho(x', y')$ , as the variance of the probability density  $\Gamma(x, y; x', y')$ :

$$\rho^2(x', y') = \frac{\iint (x^2 + y^2) \Gamma(x, y; x', y') dx dy}{\iint \Gamma(x, y; x', y') dx dy}. \quad (4)$$

Here,  $\rho(x', y')$  can be related to the bandwidth map of the spatial power-spectrum,  $\tau(x', y')$ , as

$\rho(x', y')\tau(x', y') = 2\pi$ . The local bandwidth,  $\tau(x', y')$ , itself is defined as

$$\tau^2(x', y') = \frac{\iint (k_x^2 + k_y^2) |t(k_x, k_y; x', y')|^2 dk_x dk_y}{\iint |t(k_x, k_y; x', y')|^2 dk_x dk_y}, \quad (5)$$

where  $t(k_x, k_y; x', y')$  is the Fourier transform of  $t(x, y; x', y')$  along  $(x, y)$ . Using the differentiation property of Fourier transforms as well as Parseval's theorem, this equation can be rewritten as

$$\tau^2(x', y') = \frac{\iint \left[ \left| \frac{\partial}{\partial x} t(x, y; x', y') \right|^2 + \left| \frac{\partial}{\partial y} t(x, y; x', y') \right|^2 \right] dx dy}{\iint |t(x, y; x', y')|^2 dx dy}, \quad (6)$$

Finally, we can obtain the final result as

$$\rho(x', y') = 2\pi \sqrt{\frac{\iint |t(x, y; x', y')|^2 dx dy}{\iint \left[ \left| \frac{\partial}{\partial x} t(x, y; x', y') \right|^2 + \left| \frac{\partial}{\partial y} t(x, y; x', y') \right|^2 \right] dx dy}}. \quad (7)$$

Using Eq. 7, the local spatial autocorrelation length maps can be calculated as shown in Fig. 3(b), which were obtained from the benign and malignant core phase maps shown in Fig. 3(a). We used the local window with  $a = 64$  pixels ( $8 \mu\text{m}$ ).

### 3 Results

It is evident from the correlation length maps shown in Fig. 3(b) that the value of  $\rho$  in the background regions is almost 0. Furthermore, it can be seen that the malignant core has a relatively lower  $\rho$  value compared with the benign core. In order to compare this metric across the TMA core cohort, the average value of  $\rho$  was computed for 20 benign and 20 malignant cores. This average was computed only over the foreground region consisting of tissue - the background pixels were



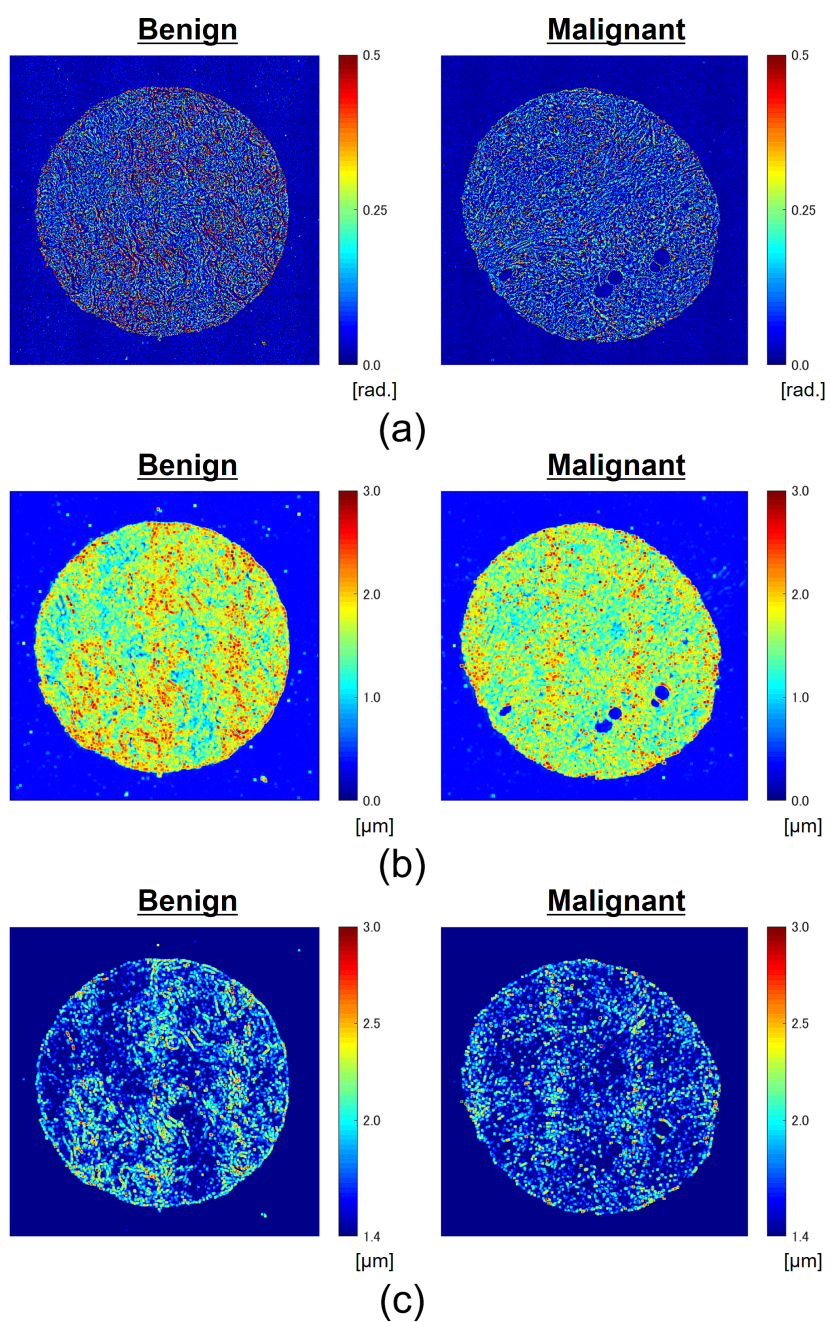

**Fig 3** Example of local spatial autocorrelation length maps. (a) Quantitative phase images. (b) The local correlation length maps. (c) The local correlation length maps after applying the mask removing  $\rho(x', y') < 1.4 \mu\text{m}$ .

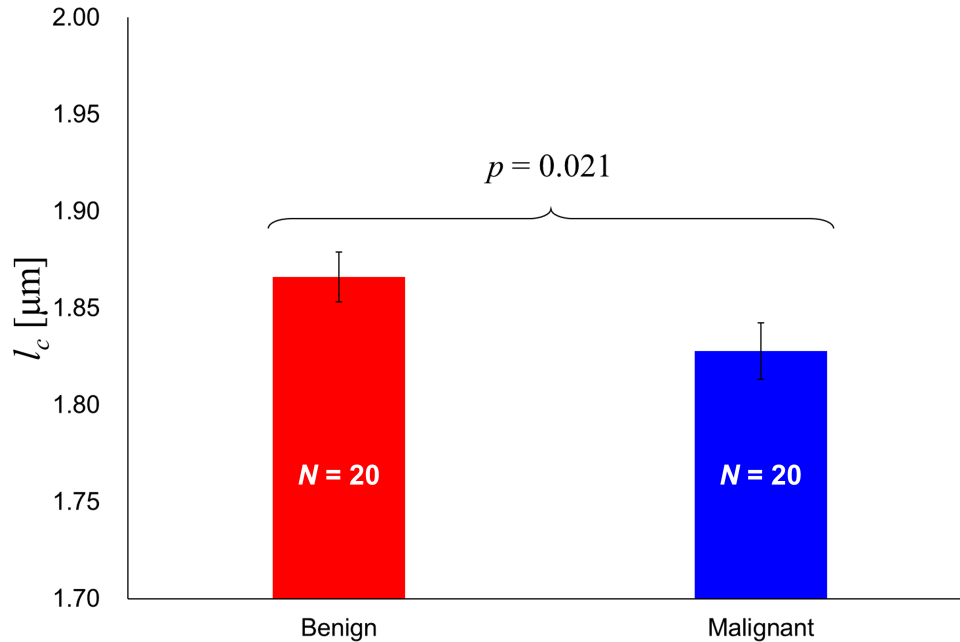

**Fig 4** Local spatial autocorrelation length of benign ( $N=20$ ) and malignant ( $N=20$ ) tissues.

segmented out by setting a threshold in the  $\rho(x, y)$  map. This threshold value was determined empirically. As shown in Fig. 3(c) all pixels having correlation lengths below  $0.14 \mu\text{m}$  were treated as background. This calculation took approximately 45 min. per core using PC with Intel Core i5-3470 CPU (3.20 GHz), 16.0 GB RAM. This calculation time can be improved, for example by using GPU acceleration.

Figure 4 compares the average  $\rho$  value between benign and malignant cores. Bar heights represent the mean while the error-bars represent the standard errors for each class. The p-value between the benign and malignant samples using two-sided Wilcoxon ranksum test was 0.021. The results indicate that there are statistically significant differences between these two groups, therefore, the local spatial autocorrelation length can be utilized as a marker for malignancy.

## 4 Summary and conclusion

In summary, we have presented an efficient algorithm for the computation of the local correlation length within refractive index maps of fixed breast tissue biopsy slides. This length metric describes the local refractive index fluctuations within the tissue specimen. Since in this work the refractive index maps are extracted using SLIM, which has sub-nanometer optical path length sensitivity, the correlation length is indicative of nanoscale cellular morphology. Standard computation of correlation length maps involves 2D Fourier transforms which can lead to long computation times, especially for large analysis window sizes. We improve calculation throughput by performing part of the computation in the frequency domain.

A comparison of the extracted correlation lengths between benign and malignant TMA cores showed that this metric is on average smaller for malignant cores indicating increased randomization of tissue morphology (as captured by its refractive index). Statistically significant differences in correlation lengths were observed between the two classes ( $N=20$  cores in each) indicating that this label-free disease marker can potentially be used by clinical pathologists for gauging the onset of malignancy especially in borderline cases.

On the other hand, there is room for improvement on the calculation time and the screening accuracy. For example, calculation acceleration by GPU will drastically improve the calculation time and the optimization of local window size and combining with other markers such as disorder strength will contribute to improve the screening accuracy. Because SLIM can be implemented as an upgrade of the existing microscopes, the extraction of intrinsic markers from quantitative phase image obtained SLIM is expect to be plugged into the existing pathology work flow. Tissue spatial correlation information can add to the existing toolbox that the pathologists already have and help

improve diagnosis accuracy and objectivity.

### *Disclosures*

Gabriel Popescu has financial interest in Phi Optics, Inc., a company developing QPI technology for materials and life science applications. The remaining authors declare no competing financial interests.

### *Acknowledgments*

We would like to thank Prof. Garth H. Rauscher for his pathology expertise. This work was supported by National Science Foundation (CBET-0939511 STC, DBI 1450962 EAGER, IIP-1353368, and CBET-1040461 MRI), and by JSPS KAKENHI Grant Number 18K14150.

This work is based partly on scientific content previously reported in SPIE proceedings: Masanori Takabayashi, Hassaan Majeed, Andre Kajdacsy-Balla, Gabriel Popescu, "High throughput calculation of local spatial autocorrelation length for label-free diagnosis of tissue biopsy", Proc. SPIE 10503, Quantitative Phase Imaging IV, 105032B; doi: 10.1117/12.2293991;

### *References*

- 1 "World health organization fact sheets: Cancer." <http://www.who.int/news-room/fact-sheets/detail/cancer>.
- 2 M. McLean, J. Srigley, D. Banerjee, *et al.*, "Interobserver variation in prostate cancer gleason scoring: Are there implications for the design of clinical trials and treatment strategies?," *Clinical Oncology* **9**, 222–225 (1997).
- 3 A. R. Feinstein, N. A. Gelfman, and R. Yesner, "Observer variability in the histopathologic diagnosis of lung cancer," *American Review of Respiratory Disease* **101**, 671–684 (1970).

- 4 A. Madabuhushi and G. Lee, “Image analysis and machine learning in digital pathology: Challenges and opportunities,” *Medical Image Analysis* **33**, 170–175 (2016).
- 5 G. Popescu, *Quantitative Phase Imaging of Cells and Tissues*, McGraw Hill, New York (2011).
- 6 Z. Wang, L. Millet, M. Mir, *et al.*, “Spatial light interference microscopy (slim),” *Optics Express* **19**, 1016–1026 (2011).
- 7 P. Wang, R. Bista, R. Bhargava, *et al.*, “Spatial-domain low-coherence quantitative phase microscopy for cancer diagnosis,” *Optics Letters* **35**, 2840–2842 (2010).
- 8 M. Takabayashi, H. Majeed, A. Kajdacsy-Balla, *et al.*, “Disorder strength measured by quantitative phase imaging as intrinsic cancer marker in fixed tissue biopsies,” *PLOS ONE* **13**, e0194320 (2018).
- 9 M. E. Kandel, S. Sridharan, J. Liang, *et al.*, “Label-free tissue scanner for colorectal cancer screening,” *Journal of Biomedical Optics* **22**, 066016 (2017).
- 10 M. Mir, Z. Wang, Z. Shen, *et al.*, “Optical measurement of cycle-dependent cell growth,” *Proceedings of the National Academy of Sciences* **108**, 13124–13129 (2011).
- 11 K. L. Cooper, S. Oh, Y. Sung, *et al.*, “Multiple phases of chondrocyte enlargement underlie differences in skeletal proportions,” *Nature* **495**, 375–378 (2013).
- 12 H. Majeed, M. E. Kandel, K. Han, *et al.*, “Breast cancer diagnosis using spatial light interference microscopy,” *Journal of Biomedical Optics* **20**, 111210 (2015).
- 13 M. Mir, Z. Wang, Z. Shen, *et al.*, “Label-free quantitative evaluation of breast tissue using spatial light interference microscopy (slim),” *Scientific Reports* **8**, 6875 (2018).

- 14 H. Majeed, C. Okoro, A. Kajdacsy-Balla, *et al.*, “Quantifying collagen fiber orientation in breast cancer using quantitative phase imaging,” *Journal of Biomedical Optics* **22**, 046004 (2017).
- 15 H. Majeed, S. Sridharan, M. Mir, *et al.*, “Quantitative phase imaging for medical diagnosis,” *Journal of Biophotonics* **10**, 177–205 (2017).
- 16 T. H. Nguyen, S. Sridharan, V. Marcias, *et al.*, “Automatic gleason grading of prostate cancer using quantitative phase imaging and machine learning,” *Journal of Biomedical Optics* **22**, 36015 (2017).
- 17 S. Ban, E. Min, S. Baek, *et al.*, “Optical properties of acute kidney injury measured by quantitative phase imaging,” *Biomedical Optics Express* **9**, 921 (2018).
- 18 Y. Park, M. Diez-Silva, G. Popescu, *et al.*, “Refractive index maps and membrane dynamics of human red blood cells parasitized by plasmodium falciparum,” *Proceedings of the National Academy of Sciences* **105**, 13730–13735 (2008).
- 19 S. Sridharan, V. Macias, K. Tangella, *et al.*, “Prediction of prostate cancer recurrence using quantitative phase imaging,” *Scientific Reports* **5**, 9976 (2015).
- 20 Z. Wang, K. Tangella, A. Balla, *et al.*, “Tissue refractive index as marker of disease,” *Journal of Biomedical Optics* **16**, 116017 (2011).
- 21 R. K. Bista, P. Wang, R. Bhargava, *et al.*, “Nuclear nano-morphology markers of histologically normal cells detect the “field effect“ of breast cancer,” *Breast Cancer Research and Treatment* **135**, 115–124 (2012).
- 22 Y. Liu, S. Uttam, S. Alexandrov, *et al.*, “Investigation of nanoscale structural alterations of cell nucleus as an early sign of cancer,” *BMC Biophysics* **7**, 1 (2014).

- 23 P. Wang, R. K. Bista, W. E. Khalbuss, *et al.*, “Nanoscale nuclear architecture for cancer diagnosis beyond pathology via spatial-domain low-coherence quantitative phase microscopy,” *Journal of Biomedical Optics* **15**, 066028 (2010).
- 24 H. V. Pham, L. Pantanowitz, and Y. Liu, “Quantitative phase imaging to improve the diagnostic accuracy of urine cytology,” *Cancer Cytopathology* **124**, 641–650 (2016).
- 25 S. Sridharan, V. Macias, K. Tangella, *et al.*, “Prediction of prostate cancer recurrence using quantitative phase imaging,” *Scientific Reports* **5**, 33818 (2016).
- 26 H. Subramanian, P. Pradhan, Y. Liu, *et al.*, “Partial-wave microscopic spectroscopy detects subwavelength refractive index fluctuations: an application to cancer diagnosis,” *Optics Letters* **34**, 518–520 (2009).
- 27 J. Chandler, H. Subramanian, C. Maneval, *et al.*, “High-speed spectral nanocytology for early cancer screening,” *Journal of Biomedical Optics* **18**, 117002 (2013).
- 28 D. Damania, H. Subramanian, A. K. Tiwari, *et al.*, “Role of cytoskeleton in controlling the disorder strength of cellular nanoscale architecture,” *Biophysical Journal* **99**, 989–996 (2010).
- 29 D. Damania, H. K. Roy, H. Subramanian, *et al.*, “Nanocytology of rectal colonocytes to assess risk of colon cancer based on field cancerization,” *Cancer research* **72**, 2720–2727 (2012).
- 30 J. S. Kim, P. Pradhan, V. Backman, *et al.*, “The influence of chromosome density variations on the increase in nuclear disorder strength in carcinogenesis,” *Physical Biology* **8**, 015004 (2011).
- 31 V. J. Konda, L. Cherkezyan, H. Subramanian, *et al.*, “Nanoscale markers of esophageal field

- carcinogenesis: potential implications for esophageal cancer screening,” *Endoscopy* **45**, 983–988 (2013).
- 32 H. K. Roy, H. Subramanian, D. Damania, *et al.*, “Optical detection of buccal epithelial nanoarchitectural alterations in patients harboring lung cancer: Implications for screening,” *Cancer Research* **70**, 7748–7754 (2010).
- 33 H. K. Roy, D. P. Damania, D. P. K. M. Delacruz, *et al.*, “Nano-architectural alterations in mucus layer fecal colonocytes in field carcinogenesis: Potential for screening,” *Cancer Prevention Research (Philadelphia, Pa.)* **6**, 1111–1119 (2013).
- 34 H. K. Roy, C. B. Brendler, H. Subramanian, *et al.*, “Nanocytological field carcinogenesis detection to mitigate overdiagnosis of prostate cancer: A proof of concept study,” *PLOS ONE* **10**, e0115999 (2015).
- 35 Y. E. Stypula-Cyrus, D. P. Damania, D. P. Kunte, *et al.*, “Hdac up-regulation in early colon field carcinogenesis is involved in cell tumorigenicity through regulation of chromatin structure,” *PLOS ONE* **8**, e64600 (2013).
- 36 H. Subramanian, H. K. Roy, P. Pradhan, *et al.*, “Nanoscale cellular changes in field carcinogenesis detected by partial wave spectroscopy,” *Cancer Research* **69**, 5357–5363 (2009).
- 37 W. J. Eldridge, Z. A. Steelman, B. Loomis, *et al.*, “Optical phase measurements of disorder strength link microstructure to cell stiffness,” *Biophysical Journal* **112**, 692–702 (2017).
- 38 A. Muñoz, W. J. Eldridge, N. M. Jakobsen, *et al.*, “Cellular shear stiffness reflects progression of arsenic-induced transformation during g1,” *Carcinogenesis* **39**, 109–117 (2018).

**Masanori Takabayashi** is an associate professor at Kyushu Institute of Technology. He received his BE, ME and PhD degree in information science and technology from Hokkaido University



in 2007, 2009 and 2012, respectively. His current research interests include volume holography, digital holography, and quantitative phase imaging for medical diagnosis.

## List of Figures

- 1 SLIM system. (a) Optical setup. (b) Phase patterns displayed on LCPM and corresponding intensity patterns.
- 2 Definition of local 2D function  $t(x, y; x', y')$ .
- 3 Example of local spatial autocorrelation length maps. (a) Quantitative phase images. (b) The local correlation length maps.
- 4 Local spatial autocorrelation length of benign ( $N=20$ ) and malignant ( $N=20$ ) tissues.
